# Supplementary material for: Anti-Microbiota Vaccine Reduces Avian Malaria Infection Within Mosquito Vectors
Source: PubMed Central journal article supplement (PMC8928750; doi:10.3389/fimmu.2022.841835), 2022-03-03

**A**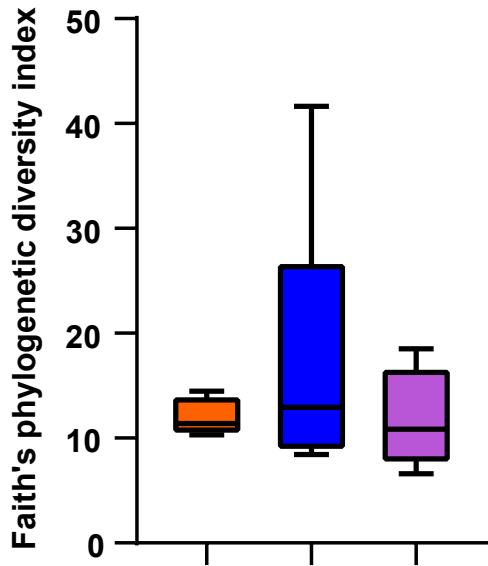**B**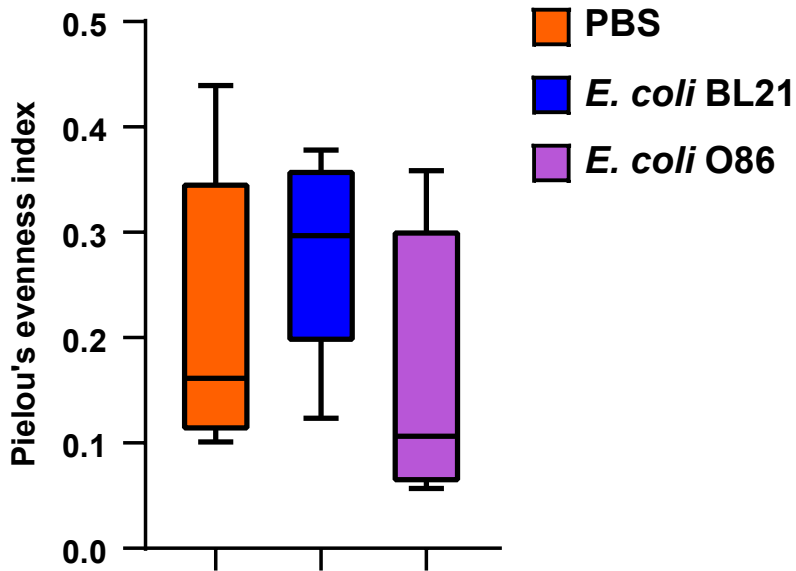

Supplement: DataSheet_1.pdf [file DataSheet_1.pdf]
